# Supplementary material for: Macromolecular dynamics of conjugated polymer in donor–acceptor blends with charge transfer complex
Source: Royal Society of Chemistry journal article supplement (doi:10.1039/c0cp01710h), 2010-12-24
Supplement: c0cp01710h.pdf [file c0cp01710h.pdf]

## Supplementary information

### Macromolecular dynamics of conjugated polymer in donor-acceptor blends with charge transfer complex

*Olga D. Parashchuk<sup>1,2</sup>, Tatyana V. Laptinskaya<sup>1</sup>, Dmitry Yu. Paraschuk<sup>\*1,2</sup>*

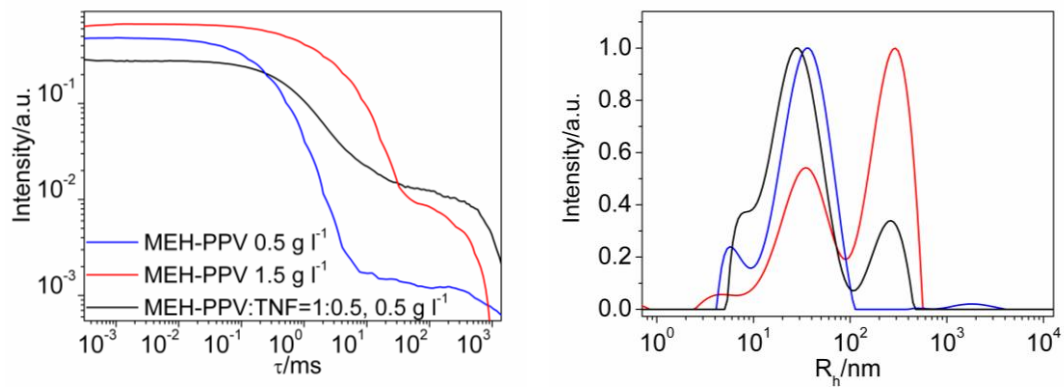

**Figure 1S.** The ACFs (a) and the corresponding RTDs (b) for MEH-PPV:TNF=1:0.5 dilute blend and pristine MEH-PPV solutions for various concentration. The scattering vector for all ACFs was  $q = 0.01 \text{ nm}^{-1}$  ( $\theta=40^\circ$ ).
